# Supplementary material
Source: ML conference proceedings conference paper supplement (https://openaccess.thecvf.com/content/CVPR2023/html/Qu_A_Characteristic_Function-Based_CVPR_2023_paper.html)
Supplement: Supplementary file 1 [file Qu_A_Characteristic_Function-Based_CVPR_2023_supplemental.pdf]

# A Characteristic Function-based Method for Bottom-up Human Pose Estimation (Supplementary Material)

Haoxuan Qu<sup>1</sup>, Yujun Cai<sup>2</sup>, Lin Geng Foo<sup>1</sup>, Ajay Kumar<sup>3</sup>, Jun Liu<sup>1,\*</sup>

<sup>1</sup>Singapore University of Technology and Design, Singapore

<sup>2</sup>Nanyang Technological University, Singapore

<sup>3</sup>The Hong Kong Polytechnic University, Hong Kong

haoxuan.qu@mymail.sutd.edu.sg, yujun001@e.ntu.edu.sg, lingeng.foo@mymail.sutd.edu.sg

ajay.kumar@polyu.edu.hk, jun.liu@sutd.edu.sg

## 1. Additional Qualitative Results

In Fig. 1, we compare our method with the baseline method (HrHRNet-W32) [2], and present qualitative results on the COCO validation set. Note that for the baseline method (HrHRNet-W32) [2], we train the backbone model with the overall L2 loss, and for our method, we train the model with the loss  $\hat{L}_{total}$  in Eq. 22 in the main paper. As shown, the baseline method can miss or misidentify body joints in some sub-regions of the predicted heatmap, whereas our method enables body joints in different sub-regions of the predicted heatmap to be located more accurately, which demonstrates the effectiveness of our method.

## 2. Additional Implementation Details about Loss

Recall that in the main paper, we construct  $\hat{L}_k$  as:

$$\hat{L}_k = \sum_{m=1}^M \left\| \frac{\gamma}{2U} (\varphi_{D(H_p)}^k(\mathbf{t}_m) - \varphi_{D(H_g)}^k(\mathbf{t}_m)) \right\|_2^2 \quad (1)$$

where  $\{\mathbf{t}_1, \dots, \mathbf{t}_M\}$  denotes a set of  $M$  vectors randomly sampled from  $B_U$ . In this section, we introduce how we calculate  $\hat{L}_k$  in more detail. Specifically, recall that  $\varphi_D(\mathbf{t}) = E_{\mathbf{x} \sim D}[e^{i\langle \mathbf{t}, \mathbf{x} \rangle}]$  and  $e^{i\langle \mathbf{t}, \mathbf{x} \rangle} = \cos(\langle \mathbf{t}, \mathbf{x} \rangle) + i \sin(\langle \mathbf{t}, \mathbf{x} \rangle)$ . Then we can rewrite  $\hat{L}_k$  as:

$$\begin{aligned} \hat{L}_k &= \sum_{m=1}^M \left\| \frac{\gamma}{2U} (\varphi_{D(H_p)}^k(\mathbf{t}_m) - \varphi_{D(H_g)}^k(\mathbf{t}_m)) \right\|_2^2 \\ &= \frac{\gamma^2}{4U^2} \sum_{m=1}^M \left\| \varphi_{D(H_p)}^k(\mathbf{t}_m) - \varphi_{D(H_g)}^k(\mathbf{t}_m) \right\|_2^2 \\ &= \frac{\gamma^2}{4U^2} \sum_{m=1}^M \left\| E_{\mathbf{x} \sim D(H_p)}[\cos(\langle \mathbf{t}_m, \mathbf{x} \rangle)] + i E_{\mathbf{x} \sim D(H_p)}[\sin(\langle \mathbf{t}_m, \mathbf{x} \rangle)] - E_{\mathbf{x} \sim D(H_g)}[\cos(\langle \mathbf{t}_m, \mathbf{x} \rangle)] - i E_{\mathbf{x} \sim D(H_g)}[\sin(\langle \mathbf{t}_m, \mathbf{x} \rangle)] \right\|_2^2 \\ &= \frac{\gamma^2}{4U^2} \sum_{m=1}^M \left( (E_{\mathbf{x} \sim D(H_p)}[\cos(\langle \mathbf{t}_m, \mathbf{x} \rangle)] - E_{\mathbf{x} \sim D(H_g)}[\cos(\langle \mathbf{t}_m, \mathbf{x} \rangle)])^2 + (E_{\mathbf{x} \sim D(H_p)}[\sin(\langle \mathbf{t}_m, \mathbf{x} \rangle)] - E_{\mathbf{x} \sim D(H_g)}[\sin(\langle \mathbf{t}_m, \mathbf{x} \rangle)])^2 \right) \end{aligned} \quad (2)$$

From Eq. 2, we can then calculate  $\hat{L}_k$  simply through sin and cos operations.

## 3. Proof of Lemma 1 in the Main Paper

In this section, we discuss Lemma 1 in the main paper.

---

\*Corresponding Author

| Body joint name:               | Right shoulders | Noses | Right eyes | Right ears |
|--------------------------------|-----------------|-------|------------|------------|
| Input Image:                   |                 |       |            |            |
| Baseline (HrHRNet-W32) result: |                 |       |            |            |
| Ours result:                   |                 |       |            |            |

  

| Body joint name:               | Right elbows | Right wrists | Left shoulders | Left knees |
|--------------------------------|--------------|--------------|----------------|------------|
| Input Image:                   |              |              |                |            |
| Baseline (HrHRNet-W32) result: |              |              |                |            |
| Ours result:                   |              |              |                |            |

Figure 1. Qualitative results of our method and the baseline method [2].

**Lemma 1.** Let  $\varphi_D$  be the characteristic function of a 2-dimensional distribution  $D$ . Let  $R^r = [x_1^{lower}, x_1^{upper}] \times [x_2^{lower}, x_2^{upper}]$  a rectangular region,  $R^e = \{x_1^{lower}, x_1^{upper}\} \times [x_2^{lower}, x_2^{upper}] \cup [x_1^{lower}, x_1^{upper}] \times \{x_2^{lower}, x_2^{upper}\}$  the edges of this region, and  $R^v = \{x_1^{lower}, x_1^{upper}\} \times \{x_2^{lower}, x_2^{upper}\}$  the vertices of this region. Let  $B_T = [-T, T] \times [-T, T]$ . Denote  $[D]_R$  the portion of the distribution  $D$  in  $R$ .  $[D]_{R^r}$  can then be written as:

$$[D]_{R^r} = \lim_{T \rightarrow \infty} \frac{1}{(2\pi)^2} \int_{B_T} \prod_{n=1}^2 \left( \frac{e^{-it_n x_n^{lower}} - e^{-it_n x_n^{upper}}}{it_n} \right) \varphi_D(\mathbf{t}) dt_1 dt_2 + \epsilon([D]_{R^r}) \quad (3)$$

where  $\epsilon([D]_{R^r}) = \frac{[D]_{R^e}}{2} + \frac{[D]_{R^v}}{4}$  and  $dt_1 dt_2$  are calculated based on the Lebesgue measure.

*Proof.* The proof sketch of Lemma 1 in the main paper is similar to the proof of Theorem 3.3.11 in [3]. Specifically, following the similar process of [3], we can first rewrite the right hand side of Eq. 3 as:

$$\begin{aligned} & \lim_{T \rightarrow \infty} \frac{1}{(2\pi)^2} \int_{B_T} \prod_{n=1}^2 \left( \frac{e^{-it_n x_n^{lower}} - e^{-it_n x_n^{upper}}}{it_n} \right) \varphi_D(\mathbf{t}) dt_1 dt_2 + \epsilon([D]_{R^r}) \\ &= \lim_{T \rightarrow \infty} \frac{1}{(2\pi)^2} \int_{\mathbb{R}^2} \left( \left( \int_{-T}^T \frac{\sin(t_1(x_1 - x_1^{lower}))}{t_1} dt_1 - \int_{-T}^T \frac{\sin(t_1(x_1 - x_1^{upper}))}{t_1} dt_1 \right) \right. \\ & \quad \left. \times \left( \int_{-T}^T \frac{\sin(t_2(x_2 - x_2^{lower}))}{t_2} dt_2 - \int_{-T}^T \frac{\sin(t_2(x_2 - x_2^{upper}))}{t_2} dt_2 \right) \right) dD + \epsilon([D]_{R^r}) \end{aligned} \quad (4)$$

Then following [3], we have the two equations below:

$$\lim_{T \rightarrow \infty} \left( \int_{-T}^T \frac{\sin(t_1(x_1 - x_1^{lower}))}{t_1} dt_1 - \int_{-T}^T \frac{\sin(t_1(x_1 - x_1^{upper}))}{t_1} dt_1 \right) = \begin{cases} 2\pi, & x_1^{lower} < x_1 < x_1^{upper} \\ \pi, & x_1 = x_1^{lower} \text{ or } x_1 = x_1^{upper} \\ 0, & x_1 < x_1^{lower} \text{ or } x_1 > x_1^{upper} \end{cases} \quad (5)$$

$$\lim_{T \rightarrow \infty} \left( \int_{-T}^T \frac{\sin(t_2(x_2 - x_2^{lower}))}{t_2} dt_2 - \int_{-T}^T \frac{\sin(t_2(x_2 - x_2^{upper}))}{t_2} dt_2 \right) = \begin{cases} 2\pi, & x_2^{lower} < x_2 < x_2^{upper} \\ \pi, & x_2 = x_2^{lower} \text{ or } x_2 = x_2^{upper} \\ 0, & x_2 < x_2^{lower} \text{ or } x_2 > x_2^{upper} \end{cases} \quad (6)$$

Then using Eq. 5 and Eq. 6, we have:

$$\begin{aligned} & \lim_{T \rightarrow \infty} \left( \left( \int_{-T}^T \frac{\sin(t_1(x_1 - x_1^{lower}))}{t_1} dt_1 - \int_{-T}^T \frac{\sin(t_1(x_1 - x_1^{upper}))}{t_1} dt_1 \right) \right. \\ & \quad \left. \times \left( \int_{-T}^T \frac{\sin(t_2(x_2 - x_2^{lower}))}{t_2} dt_2 - \int_{-T}^T \frac{\sin(t_2(x_2 - x_2^{upper}))}{t_2} dt_2 \right) \right) \\ &= \begin{cases} (2\pi)^2, & (x_1^{lower}, x_1^{upper}) \times (x_2^{lower}, x_2^{upper}) \\ (2\pi) \times \pi, & \{x_1^{lower}, x_1^{upper}\} \times (x_2^{lower}, x_2^{upper}) \cup (x_1^{lower}, x_1^{upper}) \times \{x_2^{lower}, x_2^{upper}\} \\ \pi \times \pi, & \{x_1^{lower}, x_1^{upper}\} \times \{x_2^{lower}, x_2^{upper}\} \\ 0, & \text{else} \end{cases} \end{aligned} \quad (7)$$

Then using Eq. 7, we can further rewrite Eq. 4 as:

$$\begin{aligned} & \lim_{T \rightarrow \infty} \frac{1}{(2\pi)^2} \int_{B_T} \prod_{n=1}^2 \left( \frac{e^{-it_n x_n^{lower}} - e^{-it_n x_n^{upper}}}{it_n} \right) \varphi_D(\mathbf{t}) dt_1 dt_2 + \epsilon([D]_{R^r}) \\ &= \lim_{T \rightarrow \infty} \frac{1}{(2\pi)^2} \int_{\mathbb{R}^2} \left( \left( \int_{-T}^T \frac{\sin(t_1(x_1 - x_1^{lower}))}{t_1} dt_1 - \int_{-T}^T \frac{\sin(t_1(x_1 - x_1^{upper}))}{t_1} dt_1 \right) \right. \\ & \quad \left. \times \left( \int_{-T}^T \frac{\sin(t_2(x_2 - x_2^{lower}))}{t_2} dt_2 - \int_{-T}^T \frac{\sin(t_2(x_2 - x_2^{upper}))}{t_2} dt_2 \right) \right) dD + \epsilon([D]_{R^r}) \quad (8) \\ &= ([D]_{R^r} - [D]_{R^e}) + \frac{[D]_{R^e} - [D]_{R^v}}{2} + \frac{[D]_{R^v}}{4} + \epsilon([D]_{R^r}) \\ &= [D]_{R^r} - \frac{[D]_{R^e}}{2} - \frac{[D]_{R^v}}{4} + \epsilon([D]_{R^r}) \\ &= [D]_{R^r} \end{aligned}$$

□

#### 4. Additional Details about Eq. 15 in the Main Paper

In this section, we discuss why Eq. 15 in the main paper holds. Specifically, as shown in [1], a mixture of Gaussian distributions with diagonal covariance matrices is a universal approximator of smooth distributions; some previous human pose estimation works [8, 9] also use a mixture of Gaussian distributions that effectively represents the predicted heatmaps. Therefore, we here rewrite  $D(H_p)$  as a mixture of Gaussian distributions with diagonal covariance matrices. Besides, as  $H_g$

is constructed via putting 2D Gaussian blobs centered at the GT coordinates of the body joints, we can also rewrite  $D(H_g)$  as a mixture of Gaussian distributions with diagonal covariance matrices. After rewriting both  $D(H_p)$  and  $D(H_g)$  as a mixture of Gaussian distributions with diagonal covariance matrices, following [6], denoting  $\mathbf{t} = (t_1, t_2)$ , we can write  $\varphi_{D(H_p)}^k(\mathbf{t})$  and  $\varphi_{D(H_g)}^k(\mathbf{t})$  respectively as Eq. 9 and Eq. 10 below:

$$\begin{aligned}\varphi_{D(H_p)}^k(\mathbf{t}) &= \sum_{b=1}^B w_b e^{i(\mu_b, \mathbf{t}) - \frac{1}{2}(\mathbf{t})^T \Sigma_b \mathbf{t}} \\ &= \sum_{b=1}^B w_b e^{i(\mu_{b,1} t_1 + \mu_{b,2} t_2) - \frac{1}{2}((t_1)^2 (\sigma_{b,1})^2 + (t_2)^2 (\sigma_{b,2})^2)} \\ &= \sum_{b=1}^B w_b e^{-\frac{1}{2}((t_1)^2 (\sigma_{b,1})^2 + (t_2)^2 (\sigma_{b,2})^2)} (\cos(\mu_{b,1} t_1 + \mu_{b,2} t_2) + i \sin(\mu_{b,1} t_1 + \mu_{b,2} t_2))\end{aligned}\quad (9)$$

where  $\sum_{b=1}^B w_b = 1$ ,  $w_b > 0$ ,  $\mu_b = (\mu_{b,1}, \mu_{b,2})$  is the mean of the  $b$ -th Gaussian distribution component of  $D(H_p)$ , and  $\Sigma_b = \begin{pmatrix} (\sigma_{b,1})^2 & 0 \\ 0 & (\sigma_{b,2})^2 \end{pmatrix}$  is the variance of the  $b$ -th Gaussian distribution component of  $D(H_p)$ .

$$\begin{aligned}\varphi_{D(H_g)}^k(\mathbf{t}) &= \sum_{c=1}^C w_c e^{i(\mu_c, \mathbf{t}) - \frac{1}{2}(\mathbf{t})^T \Sigma_c \mathbf{t}} \\ &= \sum_{c=1}^C w_c e^{i(\mu_{c,1} t_1 + \mu_{c,2} t_2) - \frac{1}{2}((t_1)^2 (\sigma_{c,1})^2 + (t_2)^2 (\sigma_{c,2})^2)} \\ &= \sum_{c=1}^C w_c e^{-\frac{1}{2}((t_1)^2 (\sigma_{c,1})^2 + (t_2)^2 (\sigma_{c,2})^2)} (\cos(\mu_{c,1} t_1 + \mu_{c,2} t_2) + i \sin(\mu_{c,1} t_1 + \mu_{c,2} t_2))\end{aligned}\quad (10)$$

where  $\sum_{c=1}^C w_c = 1$ ,  $w_c > 0$ ,  $\mu_c = (\mu_{c,1}, \mu_{c,2})$  is the mean of the  $c$ -th Gaussian distribution component of  $D(H_g)$ , and  $\Sigma_c = \begin{pmatrix} (\sigma_{c,1})^2 & 0 \\ 0 & (\sigma_{c,2})^2 \end{pmatrix}$  is the variance of the  $c$ -th Gaussian distribution component of  $D(H_g)$ .

After that, further denoting  $\mathbf{x} = (x_1, x_2)$ , we have:

$$\begin{aligned}& \frac{\varphi_{D(H_p)}^k(\mathbf{t}) - \varphi_{D(H_g)}^k(\mathbf{t})}{(2\pi)^2} e^{-i\langle \mathbf{t}, \mathbf{x} \rangle} \\ &= \frac{e^{-i\langle \mathbf{t}, \mathbf{x} \rangle}}{(2\pi)^2} \left( \sum_{b=1}^B w_b e^{i(\mu_{b,1} t_1 + \mu_{b,2} t_2) - \frac{1}{2}((t_1)^2 (\sigma_{b,1})^2 + (t_2)^2 (\sigma_{b,2})^2)} - \sum_{c=1}^C w_c e^{i(\mu_{c,1} t_1 + \mu_{c,2} t_2) - \frac{1}{2}((t_1)^2 (\sigma_{c,1})^2 + (t_2)^2 (\sigma_{c,2})^2)} \right) \\ &= \frac{e^{-it_1 x_1 - it_2 x_2}}{(2\pi)^2} \left( \sum_{b=1}^B w_b e^{i(\mu_{b,1} t_1 + \mu_{b,2} t_2) - \frac{1}{2}((t_1)^2 (\sigma_{b,1})^2 + (t_2)^2 (\sigma_{b,2})^2)} - \sum_{c=1}^C w_c e^{i(\mu_{c,1} t_1 + \mu_{c,2} t_2) - \frac{1}{2}((t_1)^2 (\sigma_{c,1})^2 + (t_2)^2 (\sigma_{c,2})^2)} \right) \\ &= \frac{1}{(2\pi)^2} \left( \sum_{b=1}^B w_b e^{-\frac{1}{2}((t_1)^2 (\sigma_{b,1})^2 + (t_2)^2 (\sigma_{b,2})^2)} (\cos((\mu_{b,1} - x_1)t_1 + (\mu_{b,2} - x_2)t_2) + i \sin((\mu_{b,1} - x_1)t_1 + (\mu_{b,2} - x_2)t_2)) \right. \\ & \quad \left. - \sum_{c=1}^C w_c e^{-\frac{1}{2}((t_1)^2 (\sigma_{c,1})^2 + (t_2)^2 (\sigma_{c,2})^2)} (\cos((\mu_{c,1} - x_1)t_1 + (\mu_{c,2} - x_2)t_2) + i \sin((\mu_{c,1} - x_1)t_1 + (\mu_{c,2} - x_2)t_2)) \right) \\ &= \text{Re} \left( \frac{\varphi_{D(H_p)}^k(\mathbf{t}) - \varphi_{D(H_g)}^k(\mathbf{t})}{(2\pi)^2} e^{-i\langle \mathbf{t}, \mathbf{x} \rangle} \right) + i \times \text{Im} \left( \frac{\varphi_{D(H_p)}^k(\mathbf{t}) - \varphi_{D(H_g)}^k(\mathbf{t})}{(2\pi)^2} e^{-i\langle \mathbf{t}, \mathbf{x} \rangle} \right)\end{aligned}\quad (11)$$



where:

$$\begin{aligned}
& \operatorname{Re}\left(\frac{\varphi_{D(H_p)}^k(\mathbf{t}) - \varphi_{D(H_g)}^k(\mathbf{t})}{(2\pi)^2} e^{-i\langle \mathbf{t}, \mathbf{x} \rangle}\right) \\
&= \frac{1}{(2\pi)^2} \left( \sum_{b=1}^B w_b e^{-\frac{1}{2}((t_1)^2(\sigma_{b,1})^2 + (t_2)^2(\sigma_{b,2})^2)} \cos((\mu_{b,1} - x_1)t_1 + (\mu_{b,2} - x_2)t_2) \right. \\
&\quad \left. - \sum_{c=1}^C w_c e^{-\frac{1}{2}((t_1)^2(\sigma_{c,1})^2 + (t_2)^2(\sigma_{c,2})^2)} \cos((\mu_{c,1} - x_1)t_1 + (\mu_{c,2} - x_2)t_2) \right)
\end{aligned} \tag{12}$$

$$\begin{aligned}
& \operatorname{Im}\left(\frac{\varphi_{D(H_p)}^k(\mathbf{t}) - \varphi_{D(H_g)}^k(\mathbf{t})}{(2\pi)^2} e^{-i\langle \mathbf{t}, \mathbf{x} \rangle}\right) \\
&= \frac{1}{(2\pi)^2} \left( \sum_{b=1}^B w_b e^{-\frac{1}{2}((t_1)^2(\sigma_{b,1})^2 + (t_2)^2(\sigma_{b,2})^2)} \sin((\mu_{b,1} - x_1)t_1 + (\mu_{b,2} - x_2)t_2) \right. \\
&\quad \left. - \sum_{c=1}^C w_c e^{-\frac{1}{2}((t_1)^2(\sigma_{c,1})^2 + (t_2)^2(\sigma_{c,2})^2)} \sin((\mu_{c,1} - x_1)t_1 + (\mu_{c,2} - x_2)t_2) \right)
\end{aligned} \tag{13}$$

Then denoting  $\sigma = \min(\min_{b \in B} \sigma_{b,1}, \min_{b \in B} \sigma_{b,2}, \min_{c \in C} \sigma_{c,1}, \min_{c \in C} \sigma_{c,2})$ , we can find the upper bound and the lower bound of

$\operatorname{Re}\left(\frac{\varphi_{D(H_p)}^k(\mathbf{t}) - \varphi_{D(H_g)}^k(\mathbf{t})}{(2\pi)^2} e^{-i\langle \mathbf{t}, \mathbf{x} \rangle}\right)$  and  $\operatorname{Im}\left(\frac{\varphi_{D(H_p)}^k(\mathbf{t}) - \varphi_{D(H_g)}^k(\mathbf{t})}{(2\pi)^2} e^{-i\langle \mathbf{t}, \mathbf{x} \rangle}\right)$  respectively as:

$$\begin{aligned}
& \operatorname{Re}\left(\frac{\varphi_{D(H_p)}^k(\mathbf{t}) - \varphi_{D(H_g)}^k(\mathbf{t})}{(2\pi)^2} e^{-i\langle \mathbf{t}, \mathbf{x} \rangle}\right) \\
&= \frac{1}{(2\pi)^2} \left( \sum_{b=1}^B w_b e^{-\frac{1}{2}((t_1)^2(\sigma_{b,1})^2 + (t_2)^2(\sigma_{b,2})^2)} \cos((\mu_{b,1} - x_1)t_1 + (\mu_{b,2} - x_2)t_2) \right. \\
&\quad \left. - \sum_{c=1}^C w_c e^{-\frac{1}{2}((t_1)^2(\sigma_{c,1})^2 + (t_2)^2(\sigma_{c,2})^2)} \cos((\mu_{c,1} - x_1)t_1 + (\mu_{c,2} - x_2)t_2) \right) \\
&\leq \frac{e^{-\frac{1}{2}((t_1)^2\sigma^2 + (t_2)^2\sigma^2)}}{(2\pi)^2} \left( \sum_{b=1}^B w_b - \sum_{c=1}^C (-w_c) \right) \\
&= \frac{e^{-\frac{1}{2}((t_1)^2\sigma^2 + (t_2)^2\sigma^2)}}{2\pi^2}
\end{aligned} \tag{14}$$

$$\begin{aligned}
& \operatorname{Re}\left(\frac{\varphi_{D(H_p)}^k(\mathbf{t}) - \varphi_{D(H_g)}^k(\mathbf{t})}{(2\pi)^2} e^{-i\langle \mathbf{t}, \mathbf{x} \rangle}\right) \\
&= \frac{1}{(2\pi)^2} \left( \sum_{b=1}^B w_b e^{-\frac{1}{2}((t_1)^2(\sigma_{b,1})^2 + (t_2)^2(\sigma_{b,2})^2)} \cos((\mu_{b,1} - x_1)t_1 + (\mu_{b,2} - x_2)t_2) \right. \\
&\quad \left. - \sum_{c=1}^C w_c e^{-\frac{1}{2}((t_1)^2(\sigma_{c,1})^2 + (t_2)^2(\sigma_{c,2})^2)} \cos((\mu_{c,1} - x_1)t_1 + (\mu_{c,2} - x_2)t_2) \right) \\
&\geq \frac{e^{-\frac{1}{2}((t_1)^2\sigma^2 + (t_2)^2\sigma^2)}}{(2\pi)^2} \left( \sum_{b=1}^B (-w_b) - \sum_{c=1}^C w_c \right) \\
&= -\frac{e^{-\frac{1}{2}((t_1)^2\sigma^2 + (t_2)^2\sigma^2)}}{2\pi^2}
\end{aligned} \tag{15}$$

$$\begin{aligned}
& \text{Im}\left(\frac{\varphi_{D(H_p)}^k(\mathbf{t}) - \varphi_{D(H_g)}^k(\mathbf{t})}{(2\pi)^2} e^{-i\langle \mathbf{t}, \mathbf{x} \rangle}\right) \\
&= \frac{1}{(2\pi)^2} \left( \sum_{b=1}^B w_b e^{-\frac{1}{2}((t_1)^2(\sigma_{b,1})^2 + (t_2)^2(\sigma_{b,2})^2)} \sin((\mu_{b,1} - x_1)t_1 + (\mu_{b,2} - x_2)t_2) \right. \\
&\quad \left. - \sum_{c=1}^C w_c e^{-\frac{1}{2}((t_1)^2(\sigma_{c,1})^2 + (t_2)^2(\sigma_{c,2})^2)} \sin((\mu_{c,1} - x_1)t_1 + (\mu_{c,2} - x_2)t_2) \right) \\
&\leq \frac{e^{-\frac{1}{2}((t_1)^2\sigma^2 + (t_2)^2\sigma^2)}}{(2\pi)^2} \left( \sum_{b=1}^B w_b - \sum_{c=1}^C (-w_c) \right) \\
&= \frac{e^{-\frac{1}{2}((t_1)^2\sigma^2 + (t_2)^2\sigma^2)}}{2\pi^2}
\end{aligned} \tag{16}$$

$$\begin{aligned}
& \text{Im}\left(\frac{\varphi_{D(H_p)}^k(\mathbf{t}) - \varphi_{D(H_g)}^k(\mathbf{t})}{(2\pi)^2} e^{-i\langle \mathbf{t}, \mathbf{x} \rangle}\right) \\
&= \frac{1}{(2\pi)^2} \left( \sum_{b=1}^B w_b e^{-\frac{1}{2}((t_1)^2(\sigma_{b,1})^2 + (t_2)^2(\sigma_{b,2})^2)} \sin((\mu_{b,1} - x_1)t_1 + (\mu_{b,2} - x_2)t_2) \right. \\
&\quad \left. - \sum_{c=1}^C w_c e^{-\frac{1}{2}((t_1)^2(\sigma_{c,1})^2 + (t_2)^2(\sigma_{c,2})^2)} \sin((\mu_{c,1} - x_1)t_1 + (\mu_{c,2} - x_2)t_2) \right) \\
&\geq \frac{e^{-\frac{1}{2}((t_1)^2\sigma^2 + (t_2)^2\sigma^2)}}{(2\pi)^2} \left( \sum_{b=1}^B (-w_b) - \sum_{c=1}^C w_c \right) \\
&= -\frac{e^{-\frac{1}{2}((t_1)^2\sigma^2 + (t_2)^2\sigma^2)}}{2\pi^2}
\end{aligned} \tag{17}$$

Then with Eq. 14 in the main paper rewritten as:

$$\begin{aligned}
& \left\| \lim_{T \rightarrow \infty} \int_{B_T} \int_{R_{sub}^r} \frac{\varphi_{D(H_p)}^k(\mathbf{t}) - \varphi_{D(H_g)}^k(\mathbf{t})}{(2\pi)^2} e^{-i\langle \mathbf{t}, \mathbf{x} \rangle} d\mathbf{x} d\mathbf{t} \right\|_2^2 \\
&= \left\| \int_{B_U} \int_{R_{sub}^r} \frac{\varphi_{D(H_p)}^k(\mathbf{t}) - \varphi_{D(H_g)}^k(\mathbf{t})}{(2\pi)^2} e^{-i\langle \mathbf{t}, \mathbf{x} \rangle} d\mathbf{x} d\mathbf{t} + \lim_{T \rightarrow \infty} \int_{B_T \setminus B_U} \int_{R_{sub}^r} \frac{\varphi_{D(H_p)}^k(\mathbf{t}) - \varphi_{D(H_g)}^k(\mathbf{t})}{(2\pi)^2} e^{-i\langle \mathbf{t}, \mathbf{x} \rangle} d\mathbf{x} d\mathbf{t} \right\|_2^2
\end{aligned} \tag{18}$$

we can rewrite the upper bound and the lower bound of the real part and the imaginary part of the latter term

$\lim_{T \rightarrow \infty} \int_{B_T \setminus B_U} \int_{R_{sub}^r} \frac{\varphi_{D(H_p)}^k(\mathbf{t}) - \varphi_{D(H_g)}^k(\mathbf{t})}{(2\pi)^2} e^{-i\langle \mathbf{t}, \mathbf{x} \rangle} d\mathbf{x} dt$  as:

$$\begin{aligned}
& \operatorname{Re} \left( \lim_{T \rightarrow \infty} \int_{B_T \setminus B_U} \int_{R_{sub}^r} \frac{\varphi_{D(H_p)}^k(\mathbf{t}) - \varphi_{D(H_g)}^k(\mathbf{t})}{(2\pi)^2} e^{-i\langle \mathbf{t}, \mathbf{x} \rangle} d\mathbf{x} dt \right) \\
&= \lim_{T \rightarrow \infty} \int_{B_T \setminus B_U} \int_{R_{sub}^r} \operatorname{Re} \left( \frac{\varphi_{D(H_p)}^k(\mathbf{t}) - \varphi_{D(H_g)}^k(\mathbf{t})}{(2\pi)^2} e^{-i\langle \mathbf{t}, \mathbf{x} \rangle} \right) d\mathbf{x} dt \\
&\leq \lim_{T \rightarrow \infty} \int_{B_T \setminus B_U} \int_{R_{sub}^r} \frac{e^{-\frac{1}{2}((t_1)^2 \sigma^2 + (t_2)^2 \sigma^2)}}{2\pi^2} d\mathbf{x} dt \\
&= \lim_{T \rightarrow \infty} \int_{B_T \setminus B_U} \lambda(R_{sub}^r) \frac{e^{-\frac{1}{2}((t_1)^2 \sigma^2 + (t_2)^2 \sigma^2)}}{2\pi^2} dt \\
&\leq \frac{\lambda(R_{sub}^r) e^{-\frac{1}{2}U^2 \sigma^2}}{\pi \sigma^2}
\end{aligned} \tag{19}$$

$$\begin{aligned}
& \operatorname{Re} \left( \lim_{T \rightarrow \infty} \int_{B_T \setminus B_U} \int_{R_{sub}^r} \frac{\varphi_{D(H_p)}^k(\mathbf{t}) - \varphi_{D(H_g)}^k(\mathbf{t})}{(2\pi)^2} e^{-i\langle \mathbf{t}, \mathbf{x} \rangle} d\mathbf{x} dt \right) \\
&= \lim_{T \rightarrow \infty} \int_{B_T \setminus B_U} \int_{R_{sub}^r} \operatorname{Re} \left( \frac{\varphi_{D(H_p)}^k(\mathbf{t}) - \varphi_{D(H_g)}^k(\mathbf{t})}{(2\pi)^2} e^{-i\langle \mathbf{t}, \mathbf{x} \rangle} \right) d\mathbf{x} dt \\
&\geq \lim_{T \rightarrow \infty} \int_{B_T \setminus B_U} \int_{R_{sub}^r} -\frac{e^{-\frac{1}{2}((t_1)^2 \sigma^2 + (t_2)^2 \sigma^2)}}{2\pi^2} d\mathbf{x} dt \\
&= \lim_{T \rightarrow \infty} \int_{B_T \setminus B_U} -\lambda(R_{sub}^r) \frac{e^{-\frac{1}{2}((t_1)^2 \sigma^2 + (t_2)^2 \sigma^2)}}{2\pi^2} dt \\
&\geq -\frac{\lambda(R_{sub}^r) e^{-\frac{1}{2}U^2 \sigma^2}}{\pi \sigma^2}
\end{aligned} \tag{20}$$

$$\begin{aligned}
& \operatorname{Im} \left( \lim_{T \rightarrow \infty} \int_{B_T \setminus B_U} \int_{R_{sub}^r} \frac{\varphi_{D(H_p)}^k(\mathbf{t}) - \varphi_{D(H_g)}^k(\mathbf{t})}{(2\pi)^2} e^{-i\langle \mathbf{t}, \mathbf{x} \rangle} d\mathbf{x} dt \right) \\
&= \lim_{T \rightarrow \infty} \int_{B_T \setminus B_U} \int_{R_{sub}^r} \operatorname{Im} \left( \frac{\varphi_{D(H_p)}^k(\mathbf{t}) - \varphi_{D(H_g)}^k(\mathbf{t})}{(2\pi)^2} e^{-i\langle \mathbf{t}, \mathbf{x} \rangle} \right) d\mathbf{x} dt \\
&\leq \lim_{T \rightarrow \infty} \int_{B_T \setminus B_U} \int_{R_{sub}^r} \frac{e^{-\frac{1}{2}((t_1)^2 \sigma^2 + (t_2)^2 \sigma^2)}}{2\pi^2} d\mathbf{x} dt \\
&= \lim_{T \rightarrow \infty} \int_{B_T \setminus B_U} \lambda(R_{sub}^r) \frac{e^{-\frac{1}{2}((t_1)^2 \sigma^2 + (t_2)^2 \sigma^2)}}{2\pi^2} dt \\
&\leq \frac{\lambda(R_{sub}^r) e^{-\frac{1}{2}U^2 \sigma^2}}{\pi \sigma^2}
\end{aligned} \tag{21}$$

$$\begin{aligned}
& \text{Im} \left( \lim_{T \rightarrow \infty} \int_{B_T \setminus B_U} \int_{R_{sub}^r} \frac{\varphi_{D(H_p)}^k(\mathbf{t}) - \varphi_{D(H_g)}^k(\mathbf{t})}{(2\pi)^2} e^{-i\langle \mathbf{t}, \mathbf{x} \rangle} d\mathbf{x} dt \right) \\
&= \lim_{T \rightarrow \infty} \int_{B_T \setminus B_U} \int_{R_{sub}^r} \text{Im} \left( \frac{\varphi_{D(H_p)}^k(\mathbf{t}) - \varphi_{D(H_g)}^k(\mathbf{t})}{(2\pi)^2} e^{-i\langle \mathbf{t}, \mathbf{x} \rangle} \right) d\mathbf{x} dt \\
&\geq \lim_{T \rightarrow \infty} \int_{B_T \setminus B_U} \int_{R_{sub}^r} \frac{e^{-\frac{1}{2}((t_1)^2\sigma^2 + (t_2)^2\sigma^2)}}{2\pi^2} d\mathbf{x} dt \\
&= \lim_{T \rightarrow \infty} \int_{B_T \setminus B_U} -\lambda(R_{sub}^r) \frac{e^{-\frac{1}{2}((t_1)^2\sigma^2 + (t_2)^2\sigma^2)}}{2\pi^2} dt \\
&\geq -\frac{\lambda(R_{sub}^r) e^{-\frac{1}{2}U^2\sigma^2}}{\pi\sigma^2}
\end{aligned} \tag{22}$$

Then as shown from Eq. 19 to Eq. 22, roughly speaking, the values of both the real part and the imaginary part of  $\lim_{T \rightarrow \infty} \int_{B_T \setminus B_U} \int_{R_{sub}^r} \frac{\varphi_{D(H_p)}^k(\mathbf{t}) - \varphi_{D(H_g)}^k(\mathbf{t})}{(2\pi)^2} e^{-i\langle \mathbf{t}, \mathbf{x} \rangle} d\mathbf{x} dt$  decay exponentially when  $U$  becomes larger (as both their upper bound and their lower bound decay exponentially when  $U$  becomes larger). Thus, both the real part and the imaginary part of the latter term  $\lim_{T \rightarrow \infty} \int_{B_T \setminus B_U} \int_{R_{sub}^r} \frac{\varphi_{D(H_p)}^k(\mathbf{t}) - \varphi_{D(H_g)}^k(\mathbf{t})}{(2\pi)^2} e^{-i\langle \mathbf{t}, \mathbf{x} \rangle} d\mathbf{x} dt$  outside a certain finite range  $B_U$  would be close to zero. Therefore, we can further approximate Eq. 14 in the main paper as:

$$\left\| \lim_{T \rightarrow \infty} \int_{B_T} \int_{R_{sub}^r} \frac{\varphi_{D(H_p)}^k(\mathbf{t}) - \varphi_{D(H_g)}^k(\mathbf{t})}{(2\pi)^2} e^{-i\langle \mathbf{t}, \mathbf{x} \rangle} d\mathbf{x} dt \right\|_2^2 \approx \left\| \int_{B_U} \int_{R_{sub}^r} \frac{\varphi_{D(H_p)}^k(\mathbf{t}) - \varphi_{D(H_g)}^k(\mathbf{t})}{(2\pi)^2} e^{-i\langle \mathbf{t}, \mathbf{x} \rangle} d\mathbf{x} dt \right\|_2^2 \tag{23}$$

## 5. Experiments on Top-down Methods

While our method is primarily designed for bottom-up human pose estimation to optimize the body joints over sub-regions of the predicted heatmap at the same time, we here also test the effectiveness of our method on top-down human pose estimation methods. Specifically, we here apply our method on various top-down methods including Simple Baseline [10], HRNet [7], and HRFormer [11]. We set input size to  $384 \times 288$  and following [7, 10, 11], we report the following metrics: AP, AP<sup>50</sup>, AP<sup>75</sup>, AP<sup>M</sup>, AP<sup>L</sup>, and AR. As shown in Tab. 1, after incorporating our method in various top-down methods, we also observe a consistent performance improvement. A possible reason for this is that our method enables the background sub-regions of the predicted heatmap and the sub-regions of the predicted heatmap around the body joint to be optimized simultaneously, which thus is also helpful for top-down human pose estimation.

Table 1. We also compare with top-down methods on the **COCO val2017** set and the **COCO test-dev2017** set. Though our method is primarily designed for bottom-up human pose estimation, we observe that it is also helpful for top-down methods.

| Method               | Backbone      | COCO val2017 |                  |                  |                 |                 |      | COCO test-dev2017 |                  |                  |                 |                 |      |
|----------------------|---------------|--------------|------------------|------------------|-----------------|-----------------|------|-------------------|------------------|------------------|-----------------|-----------------|------|
|                      |               | AP           | AP <sup>50</sup> | AP <sup>75</sup> | AP <sup>M</sup> | AP <sup>L</sup> | AR   | AP                | AP <sup>50</sup> | AP <sup>75</sup> | AP <sup>M</sup> | AP <sup>L</sup> | AR   |
| Simple Baseline [10] | ResNet-152    | 75.0         | 90.8             | 82.1             | 67.8            | 78.3            | 80.0 | 73.8              | 91.7             | 81.2             | 70.3            | 80.0            | 79.1 |
| + Ours               | ResNet-152    | 76.1         | 91.7             | 83.1             | 69.1            | 79.4            | 80.8 | 74.9              | 92.5             | 82.8             | 71.3            | 80.7            | 80.0 |
| HRNet [7]            | HRNet-W32     | 76.7         | 91.9             | 83.6             | 73.2            | 83.2            | 81.6 | 74.9              | 92.5             | 82.8             | 71.3            | 80.9            | 80.1 |
| + Ours               | HRNet-W32     | 77.6         | 92.2             | 84.3             | 73.5            | 84.2            | 82.0 | 75.9              | 92.8             | 83.7             | 72.6            | 81.6            | 81.0 |
| HRNet [7]            | HRNet-W48     | 77.1         | 91.8             | 83.8             | 73.5            | 83.5            | 81.8 | 75.5              | 92.5             | 83.3             | 71.9            | 81.5            | 80.5 |
| + Ours               | HRNet-W48     | 78.1         | 92.4             | 84.8             | 74.1            | 84.8            | 82.4 | 76.5              | 93.0             | 84.3             | 73.1            | 82.0            | 81.5 |
| HRFormer [11]        | HRFormer-Base | 78.0         | 92.2             | 84.8             | 74.3            | 84.6            | 82.6 | 76.2              | 92.7             | 83.8             | 72.5            | 82.3            | 81.2 |
| + Ours               | HRFormer-Base | 78.7         | 92.4             | 85.3             | 74.9            | 85.2            | 83.1 | 76.9              | 93.1             | 84.6             | 73.5            | 82.6            | 81.9 |

## 6. Dataset Licenses

The COCO dataset [5] is licensed under the following [the Creative Commons Attribution 4.0 License](#). The CrowdPose dataset [4] is released for academic research only and it is free to researchers from educational or research institutes for non-commercial purposes.

## References

- [1] Samy Bengio. An introduction to statistical machine learning—em for gmms. *Dalle Molle Institute for Perceptual Artificial Intelligence (IDIAP) slides*, 2004. 3
- [2] Bowen Cheng, Bin Xiao, Jingdong Wang, Honghui Shi, Thomas S Huang, and Lei Zhang. Higherhrnet: Scale-aware representation learning for bottom-up human pose estimation. In *Proceedings of the IEEE/CVF conference on computer vision and pattern recognition*, pages 5386–5395, 2020. 1, 2
- [3] Rick Durrett. *Probability: theory and examples*, volume 49. Cambridge university press, 2019. 3
- [4] Jiefeng Li, Can Wang, Hao Zhu, Yihuan Mao, Hao-Shu Fang, and Cewu Lu. Crowdpose: Efficient crowded scenes pose estimation and a new benchmark. In *Proceedings of the IEEE/CVF conference on computer vision and pattern recognition*, pages 10863–10872, 2019. 8
- [5] Tsung-Yi Lin, Michael Maire, Serge Belongie, James Hays, Pietro Perona, Deva Ramanan, Piotr Dollár, and C Lawrence Zitnick. Microsoft coco: Common objects in context. In *European conference on computer vision*, pages 740–755. Springer, 2014. 8
- [6] Weibo Shu, Jia Wan, Kay Chen Tan, Sam Kwong, and Antoni B Chan. Crowd counting in the frequency domain. In *Proceedings of the IEEE/CVF Conference on Computer Vision and Pattern Recognition*, pages 19618–19627, 2022. 4
- [7] Ke Sun, Bin Xiao, Dong Liu, and Jingdong Wang. Deep high-resolution representation learning for human pose estimation. In *Proceedings of the IEEE/CVF conference on computer vision and pattern recognition*, pages 5693–5703, 2019. 8
- [8] Ben Usman, Andrea Tagliasacchi, Kate Saenko, and Avneesh Sud. Metapose: Fast 3d pose from multiple views without 3d supervision. In *Proceedings of the IEEE/CVF Conference on Computer Vision and Pattern Recognition*, pages 6759–6770, 2022. 3
- [9] Chen Wang, Feng Zhang, Xiatian Zhu, and Shuzhi Sam Ge. Low-resolution human pose estimation. *Pattern Recognition*, 126:108579, 2022. 3
- [10] Bin Xiao, Haiping Wu, and Yichen Wei. Simple baselines for human pose estimation and tracking. In *Proceedings of the European conference on computer vision (ECCV)*, pages 466–481, 2018. 8
- [11] Yuhui Yuan, Rao Fu, Lang Huang, Weihong Lin, Chao Zhang, Xilin Chen, and Jingdong Wang. Hrformer: High-resolution transformer for dense prediction. 2021. 8
